# Supplementary material
Source: Springer Nature journal article supplement (https://www.springermedizin.de/resource/supplementary/12936_2007_366_MOESM3_ESM.pdf/9547648)

**A**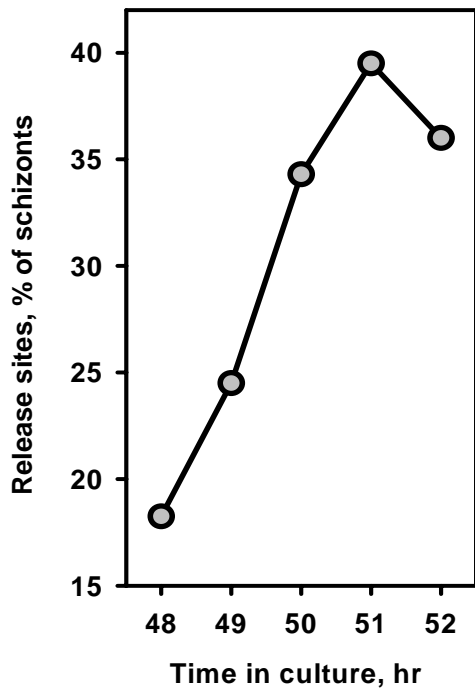**B**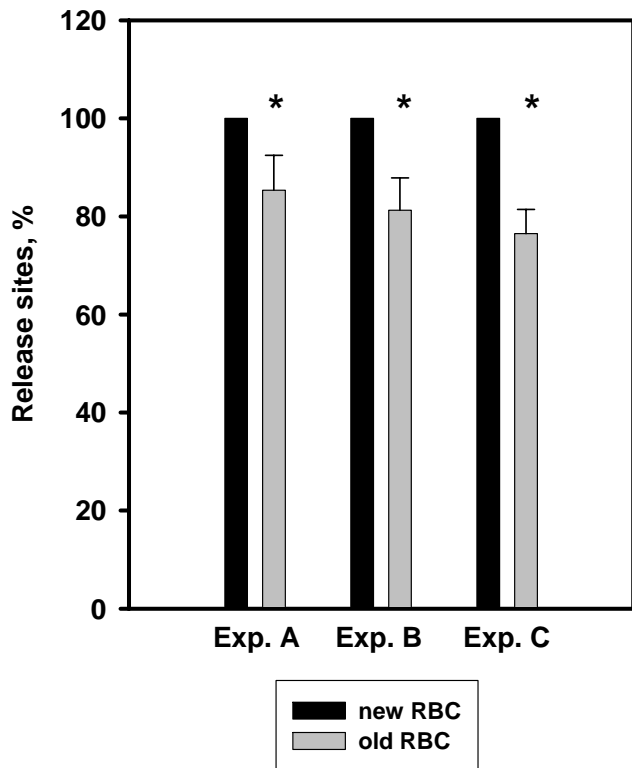

Supplement: MOESM3 [file 9547648]
